# Supplementary material for: Facile and fast synthesis of urchin-shaped Fe3O4@Bi2S3 core-shell hierarchical structures and their magnetically recyclable photocatalytic activity
Source: Royal Society of Chemistry journal article supplement (doi:10.1039/c2jm16476k), 2012-01-01
Supplement: c2jm16476k.pdf [file c2jm16476k.pdf]

## Supporting information

### Facile and fast synthesis of urchin-shaped $\text{Fe}_3\text{O}_4@\text{Bi}_2\text{S}_3$ core-shell hierarchical structures and their magnetically recyclable photocatalytic activity

Shunrui Luo,<sup>a</sup> Fang Chai,<sup>b</sup> Lingyu Zhang,<sup>a</sup> Chungang Wang<sup>\*a</sup>, Lu Li,<sup>a</sup> Xianchun Liu,  
<sup>a</sup> Zhongmin Su,<sup>\*a</sup>

<sup>a</sup> Institute of Functional Material Chemistry, Faculty of Chemistry, Northeast Normal University, Changchun 130024, P. R. China

<sup>b</sup> College of Chemistry & Chemical Engineering, Harbin Normal University, Harbin 150025, P. R. China

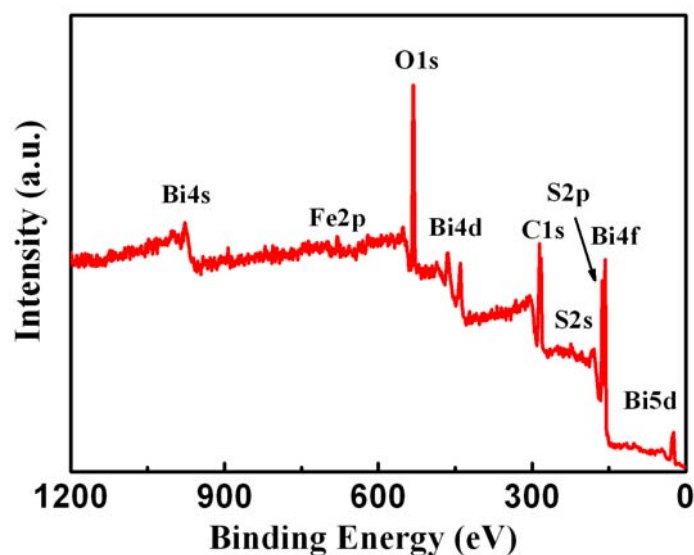

Fig. S1 XPS fully scanned spectrum of the prepared urchin-shaped  $\text{Fe}_3\text{O}_4@\text{Bi}_2\text{S}_3$  core-shell hierarchical structures.
